# **The cost and cost-effectiveness of novel tuberculosis vaccines in low- and middle-income countries: a modelling study**

## **Authors**

Allison Portnoy, ScD<sup>1</sup>, Rebecca A. Clark, MSc<sup>2-4</sup>, Matthew Quaife, PhD<sup>2-4</sup>, Chathika K. Weerasuriya, PhD<sup>2-4</sup>, Christinah Mukandavire, PhD<sup>2-4</sup>, Roel Bakker, PhD<sup>2-5</sup>, Arminder K. Deol, PhD<sup>2-4,6</sup>, Shelly Malhotra, PhD<sup>7,8</sup>, Nebiat Gebreselassie, PhD<sup>9</sup>, Matteo Zignol, MD<sup>9</sup>, So Yoon Sim, MA, MSPH<sup>10</sup>, Raymond C.W. Hutubessy, PhD<sup>10</sup>, Inés Garcia Baena, MSc<sup>9</sup>, Nobuyuki Nishikiori, PhD<sup>9</sup>, Mark Jit, PhD<sup>3,4,11</sup>, Richard G. White, PhD<sup>2-4,\*</sup>, Nicolas A. Menzies, PhD<sup>1,12\*</sup>

\* Co-senior authors

## **Affiliations**

1. Center for Health Decision Science, Harvard T.H. Chan School of Public Health, Boston, MA, USA
2. TB Modelling Group, London School of Hygiene and Tropical Medicine, London, UK
3. Centre for the Mathematical Modelling of Infectious Diseases, London School of Hygiene and Tropical Medicine, London, UK
4. Department of Infectious Disease Epidemiology, London School of Hygiene and Tropical Medicine, London, UK
5. KNCV Tuberculosis Foundation, The Hague, Netherlands
6. Coalition for Epidemic Preparedness Innovations, London, UK
7. Market Access, Global Alliance for TB Drug Development, New York, New York, USA

8. Global Access, International AIDS Vaccine Initiative, New York, New York, USA
9. Global TB Programme, World Health Organization, Geneva, Switzerland
10. Department of Immunization, Vaccines and Biologicals, World Health Organization, Geneva, Switzerland
11. School of Public Health, University of Hong Kong, Hong Kong SAR, China
12. Department of Global Health and Population, Harvard T.H. Chan School of Public Health, Boston, MA, USA

**Corresponding Author:** Allison Portnoy, Center for Health Decision Science, Harvard T.H. Chan School of Public Health, 718 Huntington Avenue 2nd Floor, Boston MA 02115, USA.  
Phone: +1(617) 432-2019. Email: [aportnoy@mail.harvard.edu](mailto:aportnoy@mail.harvard.edu).

**Word count:** 3495 out of 3500

**Acknowledgements:** The views expressed are those of the authors and do not necessarily represent the views of their respective organizations.

## Abstract

*Background:* Tuberculosis (TB) is preventable and curable but eliminating it has proven challenging. Safe and effective TB vaccines that can rapidly reduce disease burden are essential for achieving TB elimination. We assessed future costs, cost-savings, and cost-effectiveness of introducing novel TB vaccines in low- and middle-income countries (LMICs) for a range of product characteristics and delivery strategies.

*Methods:* We developed a system of epidemiological and economic models, calibrated to demographic, epidemiological, and health service data in 105 LMICs. For each country, we assessed the likely future course of TB-related outcomes under several vaccine introduction scenarios, compared to a ‘no-new-vaccine’ counterfactual. We estimated the incremental impact of vaccine introduction for a range of health and economic outcomes. In the base-case, we assumed a vaccine price of \$4.60, and used a 1x per-capita GDP cost-effectiveness threshold (both varied in sensitivity analyses).

*Findings:* Vaccine introduction was estimated to require substantial near-term resources, offset by future cost-savings from averted TB burden. From a health system perspective, vaccination was cost-effective in 65 of 105 LMICs. From a societal perspective (including productivity gains and averted patient costs), vaccination was projected to be cost-effective in 75 of 105 LMICs and cost-saving in 57 of 105 LMICs, including 96% of countries with higher TB burden. When considering the monetized value of health gains, we estimated that introduction of an adolescent/adult vaccine could produce \$258–447 billion in economic benefits by 2050.

*Interpretation:* TB vaccination would be highly impactful and cost-effective in most LMICs.

*Funding:* World Health Organization (2020/985800-0)

## Research in context

### *Evidence before this study*

Previous studies have highlighted the economic impact of tuberculosis disease and mortality, and the potential economic impact that novel tuberculosis vaccines could have on reducing this burden in specific low- and middle-income countries (LMICs). The cost and cost-effectiveness of novel tuberculosis vaccines will depend on vaccine price and delivery strategy, which may vary by country. No modelling studies have estimated cost and cost-effectiveness with country-specific assumptions for medical and non-medical costs, indirect costs, vaccine delivery costs, and delivery strategies across a wide range of LMICs.

### *Added value of this study*

We estimated the costs, cost-effectiveness, and incremental net monetary benefit of tuberculosis vaccine introduction from both the health system and societal perspective in order to inform global-level decision-making for novel tuberculosis vaccine investment and introduction. Using mathematical and economic models, we assessed scenarios for the introduction of novel vaccines with a wide range of characteristics and a diverse set of health and economic outcomes. We assumed country-specific introduction years from 2028–2047, determined based on indicators for disease burden, immunization capacity, classification of the country as an “early adopter/leader,” lack of regulatory barriers, and commercial prioritization. We varied vaccination coverage, vaccine delivery strategy, vaccine price, duration of protection, and future trends in tuberculosis incidence in scenario analysis.

Our analysis projected that an effective new tuberculosis vaccine could offer large potential health and economic benefits over 2028–2050. From a societal perspective, vaccination was projected to be cost-effective in 75 LMICs compared to a 1x per-capita gross domestic product threshold. When considering the monetized value of health gains, we estimated that introduction of an adolescent/adult vaccine could produce \$258–447 billion in economic benefits by 2050, with greater benefits in LMICs with elevated tuberculosis incidence.

### *Implications of all the available evidence*

Introduction of a new tuberculosis vaccine was found to be impactful and cost-effective for a range of assumptions on vaccine price and delivery strategies, with aggregate health and economic benefits of similar scale to the most influential health interventions in LMIC settings in recent years. The results of these analyses can be used by global and country stakeholders to inform vaccine policy and introduction preparedness, as well as decision-making around future development, adoption, and implementation of novel tuberculosis vaccines.

## Background

Tuberculosis (TB) is the world's second greatest cause of infectious disease death after COVID-19.<sup>1</sup> It remains the leading cause of death for people living with HIV and a major contributor to antimicrobial-resistance-related deaths. The COVID-19 pandemic has reversed years of progress in providing TB services and, consequently, the number of people who died from TB increased to 1·5 million in 2020.<sup>1</sup>

The World Health Organization (WHO)'s End TB Strategy targets a 90% reduction in TB mortality and 80% decline in TB incidence by 2030, compared to 2015.<sup>2</sup> Achieving these targets will require a comprehensive multisectoral response, along with transformational new tools. The cost of not meeting the End TB Targets by 2030 and facing the excess deaths resulting from COVID-19-related disruptions to TB services may translate into 31·8 million TB deaths globally corresponding to an economic loss of \$17·5 trillion between 2020 and 2050.<sup>3</sup> Developing new safe, affordable, and effective TB vaccines is critical for achieving these targets. While promising candidates exist (for example, the M72/AS01<sub>E</sub> candidate vaccine<sup>4</sup>), limited market incentives to invest in TB prevention has delayed the development of novel TB vaccines.

The WHO promotes the Full Value of Vaccines Assessment framework to improve decision-making around vaccine development and use.<sup>5,6</sup> Using this framework, we estimated the costs, cost-effectiveness, and net monetary benefit of TB vaccine introduction, from health system and societal perspectives, to inform global-level decision-making for novel TB vaccine investment and introduction.<sup>5,6</sup>

## Methods

### *Analytic overview*

We estimated a range of outcomes quantifying the health and economic impact of new vaccine introduction for affected countries. To do so, we used linked epidemiological and economic models to project changes in healthcare utilization, health outcomes, and healthcare costs for various vaccine introduction scenarios compared to a ‘no-new-vaccine’ counterfactual (full epidemiological model details have been previously described by Clark and colleagues<sup>7</sup>). We estimated outcomes for each of 105 low- and middle-income countries (LMICs) over a 2028–2050 evaluation period (Appendix S1). We summarized results as the incremental costs, cost-effectiveness, and incremental net monetary benefits of vaccine introduction. Results are presented for a range of analytic assumptions and introduction scenarios, organized by major country groupings (WHO region, World Bank income level,<sup>8</sup> and WHO high-TB burden grouping<sup>9</sup>).

### *Vaccination scenarios*

We constructed a ‘no-new-vaccine’ baseline with current TB interventions continuing into the future at current levels. Compared to this baseline, we evaluated two different vaccine product profiles: an infant ‘pre-infection’ vaccine (i.e., efficacious for individuals uninfected at time of vaccination) with 80% efficacy targeting neonates, and an adolescent/adult ‘pre- and post-infection’ vaccine (i.e., efficacious in all individuals aside from those with active TB disease at time of vaccination) with 50% efficacy, based on WHO preferred product characteristics.<sup>10</sup> For both vaccine product profiles, we assumed an average ten-year duration of protection, with exponential waning. We assumed the infant vaccine would be delivered through the routine vaccination program, and the adolescent/adult vaccine delivered through routine vaccination of

nine-year-olds plus a one-time vaccination campaign for ages 10+. In the base-case scenario, we assumed countries would achieve linear scale-up to a specified coverage over five years. Based on consultation with global stakeholders, we assumed a coverage target of 85% for the infant vaccine (average coverage of diphtheria-tetanus-pertussis third dose for LMICs<sup>11</sup>), 80% for routine delivery of adolescent/adult vaccine, and 70% of the adolescent/adult vaccination campaign.<sup>12</sup> We assumed country-specific introduction years from 2028–2047, determined based on indicators for disease burden, immunization capacity, classification of the country as an “early adopter/leader,” lack of regulatory barriers, and commercial prioritization.<sup>7</sup>

### *Epidemiological outcomes and health service utilization*

We projected future TB epidemiology and health service utilization using an age-structured TB transmission model calibrated to reported demography, TB burden estimates, and TB service utilization in each modelled country.<sup>7</sup> Out of 135 LMICs,<sup>8</sup> we excluded 20 due to lack of critical calibration data and 10 due to unsuccessful calibration results. We analyzed the remaining 105 countries (Appendix S1), representing 93·3% of global TB burden.<sup>13</sup> In countries with a significant burden of HIV-associated TB, the model included the effects of HIV and antiretroviral therapy (ART) on TB infection and progression risks. Using this model, we estimated changes in TB epidemiology and related service utilization for each modelled scenario.

### *Summary health outcomes*

We estimated disability-adjusted life-years (DALYs) averted to quantify the health gains achieved by vaccination. To calculate years lost due to disability (YLDs), we assigned each modelled health state a disability weight from the Global Burden of Disease classification system (Appendix S2).<sup>14</sup> For each scenario and year, total YLDs were calculated by summing life-years



lived across all health states, weighted by the disability weight for each state. For each scenario and year, years of life lost were calculated by multiplying deaths at each year of age by reference life expectancy at that age<sup>15</sup>, and summing across all ages.

### *Cost outcomes*

We estimated the costs of vaccine introduction, as well as changes in the costs of other health services (TB care, HIV care) by multiplying health service volume indicators (vaccines delivered, TB cases diagnosed and treated, ART patient-years) by country-specific unit costs. Diagnostics costs for drug-susceptible (DS) and rifampicin-resistant (RR) TB were obtained from published literature,<sup>16</sup> and extrapolated to all LMICs by country income level.<sup>8</sup> Unit costs for TB treatment were calculated as an average of DS-TB<sup>17</sup> and RR-TB<sup>16,18</sup> treatment costs, weighted by country-level RR-TB prevalence.<sup>1</sup>

For ART costs, direct non-medical costs (travel, accommodation, food, nutritional supplements) to the patient, and productivity costs (income loss experienced by patients during TB care), we derived unit costs by extrapolating estimates reported by the Global Health Cost Consortium<sup>19</sup> (sample size = 39) and WHO patient cost surveys (sample size = 20).<sup>20,21</sup> Productivity costs due to premature death were estimated as the incremental number of life-years gained under a given vaccination scenario, multiplied by 2020 per-capita GDP as an approximation of income.

As the per-dose cost for novel TB vaccines is unclear while products are still under development, the base-case used an LMIC price of human papillomavirus (HPV) vaccine (\$4·60) for a novel vaccine proxy with an injection supply cost per dose of \$0·11 and 5% wastage.<sup>22,23</sup> Country-specific vaccine delivery costs were based on a meta-analysis of childhood<sup>24</sup> and HPV vaccine delivery unit costs for the infant and adolescent/adult vaccines, respectively, plus additional one-

time vaccine introduction costs (\$0.65 and \$2.40 per targeted individual in the first year of introduction for infant and adolescent/adult vaccines, respectively).<sup>25</sup> Costs are reported in 2020 US dollars.

### *Cost-effectiveness analysis*

Incremental cost-effectiveness ratios (ICERs) were calculated from health system and societal perspectives, with a 3% discount rate, across the 2028–2050 evaluation period. We also reported a specification in which costs are discounted but not health outcomes. The health system perspective considered costs of vaccine introduction, plus the costs of TB and HIV services indirectly affected by vaccine introduction. The societal perspective additionally included patient non-medical and productivity costs. ICERs were compared to a range of country-specific cost-effectiveness thresholds, including multiples of per-capita GDP<sup>26</sup> and recent estimates of the opportunity cost of healthcare spending.<sup>27,28</sup>

### *Return on investment*

We quantified the return on investment as the incremental net monetary benefit (iNMB) from the societal perspective of each vaccine scenario compared to baseline for a range of willingness-to-pay thresholds.<sup>26-28</sup> iNMB was calculated as the sum of monetized health gains (DALYs averted multiplied by the estimated willingness-to-pay per DALY averted) minus incremental costs. We estimated the market size for each vaccine product profile, summing all individuals across 2028–2050 who were vaccinated in the model in the base-case scenario in countries in which the vaccine was cost-effective (ICER less than per-capita GDP). We also estimated market size based on countries in which vaccination was cost-saving under the societal perspective.

### *Statistical analysis*

We explored estimation uncertainty using a 2<sup>nd</sup>-order Monte Carlo simulation.<sup>29</sup> We constructed probability distributions representing uncertainty in economic inputs and disability weights and drew 1000 random values for each uncertain parameter. We represented uncertainty in healthcare utilization and epidemiological outcomes (counts of each outcome by scenario, year, and population stratum) using 1000 results sets from the transmission-dynamic model. This analysis generated 1000 estimates for each outcome of interest, which we summarized as equal-tailed 95% uncertainty intervals.

### *Sensitivity analysis*

Compared to the base-case coverage targets (85%, 80%, 70% for routine infant vaccine delivery, routine adolescent vaccine delivery, and campaign adolescent/adult vaccine delivery, respectively), we examined a low-coverage scenario (75%, 70%, and 50%, respectively) and a high-coverage scenario (95%, 90%, and 90%, respectively).

We examined two alternative vaccine delivery scenarios. First, we modelled an accelerated scale-up scenario in which all countries introduced vaccination in 2025 and achieved instantaneous scale-up to the specified coverage target. Second, we modelled a routine-only scenario which removed the one-time campaign-delivery component of the adolescent/adult base-case scenario.

We examined three alternative vaccine price scenarios, including scenarios in which the base-case vaccine price of \$4.60 was both halved (\$2.30) and doubled (\$9.20), respectively. A third scenario examined high-middle-tier vaccine pricing, with higher prices for middle-income countries based on UNICEF vaccine pricing data (\$10.25 for non-Gavi countries with gross

national income (GNI) per capita less than \$3,995 and \$14·14 for non-Gavi countries with GNI per capita greater than \$3,995; Appendix S1).<sup>22</sup>

We also estimated results with an alternative set of assumptions about TB incidence trends in the no-new-vaccine baseline, with incidence assumed to decline more rapidly through the scale-up of existing preventive treatment and case detection, meeting the 2025 ‘End TB’ incidence reduction target without introduction of a new vaccine.<sup>2</sup>

Compared to the base-case assumption of ten-year duration of protection, we also examined lifelong duration of protection conferred by vaccination.

### *Role of the funding source*

The funder was involved in developing the research question, study design, and provided comments on the manuscript draft, but had no role in the collection, analysis, and interpretation of the data, or writing of the report. All authors had the opportunity to access and verify the data, and all authors were responsible for the decision to submit the manuscript for publication.

## **Results**

### *Costs and cost-effectiveness analysis*

In the no-new-vaccine baseline, over 2028–2050, total undiscounted costs of TB diagnosis and treatment were estimated to be \$17·6 (95% uncertainty interval: 10·8–26·7) billion for DS-TB and \$14·8 (12·0–17·9) billion for RR-TB (Appendix S3). For the infant vaccine scenario, vaccine

introduction costs were \$9.7 (7.9–13.9) billion, and averted TB diagnosis and treatment costs were \$295 (192–419) million for DS-TB and \$244 (205–290) million for RR-TB over 2028–2050 (Appendix S4). For the adolescent/adult vaccine scenario, vaccine introduction costs were \$32.7 (24.7–49.1) billion, and averted TB diagnosis and treatment costs were \$2.1 (1.3–3.1) billion for DS-TB and \$1.8 (1.5–2.1) billion for RR-TB over 2028–2050 (Appendix S5)—greater than the averted disease costs in the infant vaccine scenario. There would also be \$18.1 (13.7–24.7) million and \$276 (215–356) million in additional ART costs under the infant and adolescent/adult vaccine scenarios, respectively, due to extended survival among people living with HIV (Appendices S6–S7).

There was greater, and more rapid, impact from an adolescent/adult vaccine compared to an infant vaccine over the study period (Appendices S8–S9). Across 2028–2050, infant vaccine costs were projected to increase smoothly from the year of vaccine introduction, whereas the adolescent/adult vaccine scenario required major upfront investments during vaccine introduction and 5-year campaign roll-out, then decreased substantially after campaigns were completed.

In the base-case analysis, from the health system perspective, we found that infant vaccination would be cost-effective (ICER below 1-times per-capita GDP) compared to no vaccination in 48 of 105 modelled LMICs (46%) and 26 of 27 with high-TB burden (96%). Using the same assumptions, we found that adolescent/adult vaccination would be cost-effective in 65 out of 105 countries (62%) and all 27 with high-TB burden. Neither vaccine strategy would be cost-saving in any country. Figure 1 displays the distribution of country-level cost-effectiveness results from the health system perspective for infant and adolescent/adult vaccines, stratified by TB incidence

level. Vaccine introduction was more likely to be cost-effective in countries with higher TB incidence.

From the societal perspective, the infant vaccine was cost-effective in 55 out of 105 countries (52%), including all with high-TB burden, and cost-saving in 47 countries (45%). Similarly, the adolescent/adult vaccine was cost-effective in 75 out of 105 countries (71%), remaining cost-effective in all with high-TB burden, and cost-saving in 57 countries (54%). Figure 2 displays the percentage of the modelled population that live in countries where vaccination was cost-effective based on different cost-effectiveness thresholds (Appendix S10 shows the percentage of countries where vaccination was cost-effective; Appendices S11–S12 present tabular results).

Tables 1 and 2 report summary health outcomes, costs, and cost-effectiveness of the base-case vaccination scenarios. Across all 105 analyzed countries, the majority of TB cost-savings accrued in high-TB-burden settings, particularly in lower middle-income settings and WHO African region (AFR) and South-East Asian region (SEAR). Assuming 0% discounting on health outcomes decreased ICERs (indicating greater cost-effectiveness) for the infant vaccine by approximately 76% and for the adolescent/adult vaccine by approximately 69% from the health system perspective (Appendices S13–S14).

### *Return on investment*

With each averted DALY valued at per-capita GDP and costs assessed from the societal perspective, we estimated a cumulative \$50.8 (range: \$32.6–74.7 across examined thresholds) billion incremental net monetary benefit (iNMB) globally for infant vaccine introduction in countries where introduction was cost-effective at 1-times per-capita GDP (Figure 3; tabular results in Appendix S15). For the adolescent/adult vaccine, we estimated iNMB of \$343 billion

for countries in which vaccination was cost-effective (range: \$258–447 billion). These benefits were concentrated in regions (AFR, SEAR) with higher disease burden. For the infant vaccine, the market size (i.e., the vaccinated population in countries in which the vaccine would be cost-effective at per-capita GDP from the societal perspective) would be 1.26 (1.25–1.27) billion individuals, while for the adolescent/adult vaccine this population size would be 3.602 (3.599–3.604) billion individuals. Under a more restrictive assumption where the vaccine is only introduced in countries where the societal ICER is cost-saving, the market size would be 1.19 (1.18–1.20) billion individuals for the infant vaccine, and 3.224 (3.222–3.226) billion individuals for the adolescent/adult vaccine. The largest markets were in the WHO SEAR and WPR regions (Appendices S16–S17).

### *Sensitivity analysis*

From both health system and societal perspectives, DALYs averted and costs decreased in the low-coverage scenario, and increased in the high-coverage scenario, for both the infant and the adolescent/adult vaccine, with evidence of diminishing returns as coverage increases (Appendices S18–S21).

Compared to the base-case vaccination introduction and delivery scenario, the accelerated scale-up scenario had greater health impact (DALYs averted) and better cost-effectiveness (assuming per-unit vaccination costs were unchanged), with vaccination being cost-effective in a greater number of countries compared to a per-capita GDP threshold (i.e., 70 compared to 48 for the infant vaccine and 98 compared to 65 for the adolescent/adult vaccine from the health system perspective; Appendices S22–S25). Conversely, the routine-only scenario had a much smaller health impact and modestly worse cost-effectiveness profile, as compared to the base-case analysis (Appendix S26).

Reducing the vaccine price by half decreased infant vaccination costs from \$9.7 to \$6.5 billion (33% decrease) and adolescent/adult vaccination costs from \$32.7 to \$24.7 billion (25% decrease; Appendices S27–S36). Doubling the vaccine price increased infant vaccination costs to \$17.5 billion (80% increase) and adolescent/adult vaccination costs to \$53.7 billion (64% increase). Switching to high-middle-tier vaccine pricing (higher vaccine prices for middle-income countries) increased infant vaccine costs to \$14.6 billion (50% increase) and adolescent/adult vaccination costs to \$48.7 billion (a 49% increase). From the health system perspective, reducing the vaccine price by half increased the number of countries in which infant vaccination was cost-effective at a per-capita GDP threshold from 48 to 51, whereas doubling the vaccine price decreased the number of cost-effective countries to 33. Assuming higher vaccine prices for middle-income countries reduced the number of countries in which the infant vaccine was cost-effective at a per-capita GDP threshold from 48 to 42. Similarly, the half-price scenario, double-price scenario, and high-middle-tier-price scenario changed the number of countries in which the adolescent/adult vaccine was considered cost-effective from the health system perspective at a per-capita GDP threshold from 65 in the base-case, to 70, 52, and 56, respectively.

Assuming the no-new-vaccine baseline with faster incidence reductions through strengthening of current TB interventions to meet the 2025 End TB targets, a number of countries remained cost-saving from the societal perspective (9 countries for infant vaccine and 25 countries for adolescent/adult vaccine; Appendices S37–S38).

An infant vaccine with lifelong duration of protection averted 27.5 (23.9–31.6) million DALYs, a 52% increase compared to the base-case assumption of 10-year protection (Appendix S39). An adolescent/adult vaccine with lifelong duration of protection averted 94.8 (86.7–103) million



DALYs (36% greater than the base-case; Appendix S40). Both vaccine products remained cost-saving from the societal perspective; assuming lifelong duration of protection decreased the ICER by approximately 40% and 35% for the infant and adolescent/adult vaccine, respectively (health system perspective).

## Discussion

An effective novel TB vaccine would offer large potential health and economic benefits over 2028–2050. These results demonstrate that, when available, TB vaccines could be cost-effective in a majority of LMICs, particularly from the societal perspective, and essentially in all high-burden countries. Introducing novel TB vaccines could also offer high value in terms of incremental net monetary benefit to patients, the health system, and society, particularly in countries with high burden of TB, HIV-associated TB, and/or multidrug-resistant/RR-TB.

For both vaccine product profiles, vaccination was more likely to be cost-effective in lower middle-income countries (relative to low-income and upper middle-income countries), as countries in this income group are more likely to have both significant TB burden and sufficient economic resources to justify additional TB investments without displacing other important health interventions. Vaccination was more frequently cost-effective in AFR and SEAR regions and both vaccines were estimated to be cost-effective in all countries in the 27 modelled high-TB burden countries that accounted for 81·8% of global incident TB cases and 80·9% of global TB deaths in 2020.<sup>9,13</sup> Although vaccines can be economically less viable for manufacturers, we estimated large potential markets for vaccinees in high-burden, middle-income settings.

There was greater, and more rapid, impact from an adolescent/adult vaccine over the 2028–2050 time horizon compared to an infant vaccine, as this vaccine is targeted to a population with the highest burden of TB, and the delay between vaccination and TB prevention impact is shorter with the adolescent/adult vaccine. For the adolescent/adult vaccine, we estimated major short-term costs from introduction and one-time vaccination campaigns, with the highest costs incurred during the ten years following vaccine introduction. In contrast, the cost-savings from averted TB disease were realized gradually over 2028–2050, growing in magnitude towards the end of the time horizon. By assuming the no-new-vaccine baseline meeting the End TB targets, the remaining TB burden that could be averted by vaccination was estimated to be smaller, yielding results that were less cost-effective.

This analysis had several limitations. We were constrained by data availability, with only 105 countries successfully parameterized and calibrated. However, these 105 countries represent 93.3% of LMIC TB incidence and 93.6% of LMIC TB mortality globally in 2020.<sup>13</sup> As a “pre- and post-infection” vaccine, the adolescent/adult vaccine was assumed to be equally effective regardless of previous infection status, which may have led to an overestimation of averted TB cases and deaths if the vaccine is less effective in infected vaccinees. We also extrapolated from published literature<sup>16–18</sup> for several major unit cost inputs, potentially omitting important country-level heterogeneity in these costs. The sample size of patient cost surveys used for non-medical and productivity costs was small (20); therefore, the extrapolation to other country settings may not capture the level of potential variation in these costs. We did not investigate targeting high-risk subgroups for vaccination; vaccination could still be cost-effective when targeted to subgroups in settings where vaccination was not estimated to be cost-effective in a national roll-

out. Finally, we did not consider all possible product and introduction scenarios, but demonstrated the potential value of novel TB vaccines according to specified characteristics.

Across this analysis, introduction of a novel TB vaccine was found to be impactful and cost-effective for a range of assumptions on vaccine price and delivery strategies, with aggregate health and economic benefits of similar scale to the most influential health interventions in LMIC settings in recent years.<sup>30</sup> TB vaccines are still under development, so their potential effectiveness and impact are uncertain. Accelerating the timeline for vaccine introduction, decreasing the vaccine price, or increasing vaccine efficacy could all impact the cost-effectiveness profile of vaccination and increase the magnitude of the benefits, directly improving the welfare of individuals and households which would otherwise experience the health and economic consequences of TB in coming years. Future work should investigate country-level vaccine policy questions to support introduction preparedness. The results of these analyses can be used by global and country stakeholders to inform these questions, as well as decision-making around future development, adoption, and implementation of novel TB vaccines.

## **Acknowledgements**

We are grateful for the support of the World Health Organization for funding this research (2020/985800-0). We thank all the attendees at the WHO meetings on the Full Value Assessment of TB Vaccines for insightful advice and direction.

## **Ethics approval and consent to participate**

Not applicable.

## **Author contributions**

AP, NAM, RGW, MQ, and MJ conceptualized and designed the study. AP conducted the analysis with support from NAM, RAC, MQ, MJ, CKW, CM, AKD, and RGW. AP, NAM, RAC, and RGW drafted the initial manuscript and approved the final manuscript as submitted. MQ, CKW, CM, RB, AKD, SM, NG, MZ, SYS, RH, IGB, NN, and MJ critically reviewed the analysis, reviewed and revised the manuscript, and approved the final manuscript as submitted. All authors read and approved the final manuscript.

## **Declarations of interests**

RAC is funded by BMGF (INV-001754) and received a grant from the Canadian Centennial Scholarship Fund. CKW is funded by UKRI/MRC (MR/N013638/1). RGW is funded by the Wellcome Trust (218261/Z/19/Z), NIH (1R01AI147321-01), EDTCP (RIA208D-2505B), UK MRC (CCF17-7779 via SET Bloomsbury), ESRC (ES/P008011/1), BMGF (OPP1084276, OPP1135288 & INV-001754) and the WHO (2020/985800-0). All other authors declare no conflicts of interest.

**Table 1. Discounted costs, disability-adjusted life-years (DALYs) averted, and cost-effectiveness of infant tuberculosis vaccines**

| Country grouping                   | Health system perspective <sup>a</sup><br>incremental cost<br>(USD billions) | Societal perspective <sup>b</sup><br>incremental cost<br>(USD billions) | DALYs averted<br>(millions) | Health system cost (USD) per DALY averted | Societal cost (USD) per DALY averted |
|------------------------------------|------------------------------------------------------------------------------|-------------------------------------------------------------------------|-----------------------------|-------------------------------------------|--------------------------------------|
| All countries                      | 6.61 (5.38, 9.23)                                                            | -28.5 (-33.6, -23.5)                                                    | 18.1 (15.7, 20.9)           | 368 (283, 522)                            | cost-saving <sup>c</sup>             |
| High-TB burden <sup>d</sup>        | 4.43 (3.66, 6.18)                                                            | -28.9 (-33.9, -24.1)                                                    | 16.7 (14.3, 19.5)           | 267 (206, 381)                            | cost-saving <sup>c</sup>             |
| High-TB/HIV burden <sup>d</sup>    | 3.13 (2.6, 4.23)                                                             | -25.5 (-30.5, -21.0)                                                    | 14.6 (12.2, 17.3)           | 216 (166, 303)                            | cost-saving <sup>c</sup>             |
| High-MDR/RR-TB burden <sup>d</sup> | 3.90 (3.18, 5.49)                                                            | -27.2 (-32.1, -22.4)                                                    | 14.8 (12.4, 17.6)           | 266 (201, 386)                            | cost-saving <sup>c</sup>             |
| Income level <sup>e</sup>          |                                                                              |                                                                         |                             |                                           |                                      |
| LIC                                | 0.97 (0.83, 1.25)                                                            | -0.25 (-0.51, 0.05)                                                     | 2.02 (1.69, 2.45)           | 485 (373, 645)                            | cost-saving (cost-saving, 28.3)      |
| LMIC                               | 3.41 (2.84, 4.61)                                                            | -23.8 (-28.4, -19.5)                                                    | 14.9 (12.7, 17.7)           | 230 (178, 323)                            | cost-saving <sup>c</sup>             |
| UMIC                               | 2.22 (1.67, 3.52)                                                            | -4.43 (-6.48, -2.63)                                                    | 1.11 (0.84, 1.5)            | 2044 (1273, 3346)                         | cost-saving <sup>c</sup>             |
| World region                       |                                                                              |                                                                         |                             |                                           |                                      |
| AFR                                | 2.09 (1.78, 2.73)                                                            | -13.6 (-17.3, -10.6)                                                    | 9.36 (7.73, 11.3)           | 226 (170, 307)                            | cost-saving <sup>c</sup>             |
| AMR                                | 0.59 (0.44, 0.92)                                                            | 0.20 (0.04, 0.54)                                                       | 0.06 (0.05, 0.07)           | 9520 (6680, 14900)                        | 3350 (537, 8730)                     |
| EMR                                | 0.90 (0.74, 1.23)                                                            | -0.70 (-1.39, -0.11)                                                    | 1.65 (1.15, 2.26)           | 567 (366, 873)                            | cost-saving <sup>c</sup>             |
| EUR                                | 0.37 (0.26, 0.62)                                                            | 0.15 (0.04, 0.39)                                                       | 0.04 (0.03, 0.04)           | 9930 (6660, 17100)                        | 4130 (953, 10900)                    |
| SEAR                               | 1.38 (1.13, 1.89)                                                            | -10.2 (-13.3, -7.73)                                                    | 5.54 (4.18, 7.36)           | 254 (173, 388)                            | cost-saving <sup>c</sup>             |
| WPR                                | 1.28 (0.99, 2.00)                                                            | -4.27 (-5.97, -2.88)                                                    | 1.43 (1.04, 1.95)           | 920 (587, 1510)                           | cost-saving <sup>c</sup>             |

<sup>a</sup> Costs from the health system perspective include vaccination costs, tuberculosis testing and treatment costs, and antiretroviral treatment costs.

<sup>b</sup> Costs from the societal perspective include health system perspective costs, as well as patient non-medical costs and productivity losses.

<sup>c</sup> Both the point estimate and the interval estimates are cost-saving.

<sup>d</sup> High-TB, high-TB/HIV (HIV-associated TB), and high-MDR/RR-TB (multidrug/rifampicin-resistant TB) burden countries as defined by the World Health Organization.<sup>9</sup>

<sup>e</sup> LIC: Gross national income (GNI) per capita of \$1,025 or less; LMIC: GNI per capita of \$1,026 to \$3,995; UMIC: GNI per capita of \$3,996 to \$12,375 (World Bank 2019).

Note: All countries include 105 low- and middle-income countries analyzed. AFR = African region; AMR = Region of the Americas; EMR = Eastern Mediterranean region; EUR = European region; GDP = gross domestic product; LIC = low-income; LMIC = lower middle-income; SEAR = Southeast Asian region; UMIC = upper middle-income; WPR = Western Pacific region.

**Table 2. Discounted costs, disability-adjusted life-years (DALYs) averted, and cost-effectiveness of adolescent/adult tuberculosis vaccines**

| Country grouping                      | Health system perspective <sup>a</sup><br>incremental cost<br>(USD billions) | Societal perspective <sup>b</sup><br>incremental cost<br>(USD billions) | Incremental<br>DALYs averted<br>(millions) | Health system<br>cost (USD) per<br>DALY averted | Societal cost<br>(USD) per DALY<br>averted |
|---------------------------------------|------------------------------------------------------------------------------|-------------------------------------------------------------------------|--------------------------------------------|-------------------------------------------------|--------------------------------------------|
| All countries                         | 24.5 (18.1, 37.1)                                                            | -108 (-122, -92.1)                                                      | 69.7 (63.3, 76.5)                          | 352 (253, 535)                                  | cost-saving <sup>c</sup>                   |
| High-TB burden <sup>d</sup>           | 17.5 (12.8, 26.8)                                                            | -106 (-119, -91.0)                                                      | 63.6 (57.3, 70.4)                          | 275 (194, 421)                                  | cost-saving <sup>c</sup>                   |
| High-TB/HIV<br>burden <sup>d</sup>    | 10.7 (8.03, 15.6)                                                            | -97.5 (-110, -84.8)                                                     | 56.8 (51.0, 63.2)                          | 190 (135, 277)                                  | cost-saving <sup>c</sup>                   |
| High-MDR/RR-TB<br>burden <sup>d</sup> | 16.0 (11.5, 25.0)                                                            | -99.4 (-113, -85.4)                                                     | 56.6 (50.5, 62.9)                          | 284 (196, 441)                                  | cost-saving <sup>c</sup>                   |
| <b>Income level<sup>e</sup></b>       |                                                                              |                                                                         |                                            |                                                 |                                            |
| LIC                                   | 2.64 (2.10, 3.53)                                                            | -1.63 (-2.43, -0.62)                                                    | 7.05 (6.20, 7.92)                          | 376 (285, 514)                                  | cost-saving <sup>c</sup>                   |
| LMIC                                  | 11.6 (8.80, 16.6)                                                            | -89.3 (-100, -78.3)                                                     | 57.6 (51.8, 64)                            | 202 (147, 292)                                  | cost-saving <sup>c</sup>                   |
| UMIC                                  | 10.2 (6.70, 18.1)                                                            | -17.2 (-24.0, -7.69)                                                    | 5.03 (4.11, 6.29)                          | 2060 (1230, 3900)                               | cost-saving <sup>c</sup>                   |
| <b>World region</b>                   |                                                                              |                                                                         |                                            |                                                 |                                            |
| AFR                                   | 4.93 (3.93, 6.64)                                                            | -41.7 (-49.6, -35.2)                                                    | 29.1 (26.0, 32.4)                          | 170 (130, 237)                                  | cost-saving <sup>c</sup>                   |
| AMR                                   | 2.55 (1.73, 4.37)                                                            | -0.09 (-1.00, 1.81)                                                     | 0.49 (0.44, 0.55)                          | 5190 (3440, 8900)                               | cost-saving (cost-<br>saving, 3650)        |
| EMR                                   | 2.80 (2.19, 3.87)                                                            | -1.91 (-3.25, -0.49)                                                    | 4.92 (3.86, 6.16)                          | 578 (403, 850)                                  | cost-saving <sup>c</sup>                   |
| EUR                                   | 1.37 (0.92, 2.35)                                                            | -0.40 (-0.90, 0.56)                                                     | 0.35 (0.31, 0.38)                          | 3990 (2630, 7000)                               | cost-saving (cost-<br>saving, 1710)        |
| SEAR                                  | 6.22 (4.63, 9.07)                                                            | -53.2 (-62.0, -44.5)                                                    | 30.2 (25.7, 35.3)                          | 208 (143, 313)                                  | cost-saving <sup>c</sup>                   |
| WPR                                   | 6.58 (4.31, 11.55)                                                           | -10.8 (-13.9, -5.45)                                                    | 4.62 (3.99, 5.30)                          | 1430 (913, 2540)                                | cost-saving <sup>c</sup>                   |

<sup>a</sup> Costs from the health system perspective include vaccination costs, tuberculosis testing and treatment costs, and antiretroviral treatment costs.

<sup>b</sup> Costs from the societal perspective include health system perspective costs, as well as patient non-medical costs and productivity losses.

<sup>c</sup> Both the point estimate and the interval estimates are cost-saving.

<sup>d</sup> High-TB, high-TB/HIV (HIV-associated TB), and high-MDR/RR-TB (multidrug/rifampicin-resistant TB) burden countries as defined by the World Health Organization.<sup>9</sup>

<sup>e</sup> LIC: Gross national income (GNI) per capita of \$1,025 or less; LMIC: GNI per capita of \$1,026 to \$3,995; UMIC: GNI per capita of \$3,996 to \$12,375 (World Bank 2019).

Note: All countries include 105 low- and middle-income countries analyzed. Values in parentheses represent equal-tailed 95% credible intervals. AFR = African region; AMR = Region of the Americas; EMR = Eastern Mediterranean region; EUR = European region; GDP = gross domestic product; LIC = low-income; LMIC = lower middle-income; SEAR = Southeast Asian region; UMIC = upper middle-income; WPR = Western Pacific region.

**Figure 1. Cost-effectiveness results from the health system perspective for novel tuberculosis vaccines by country and vaccine.**

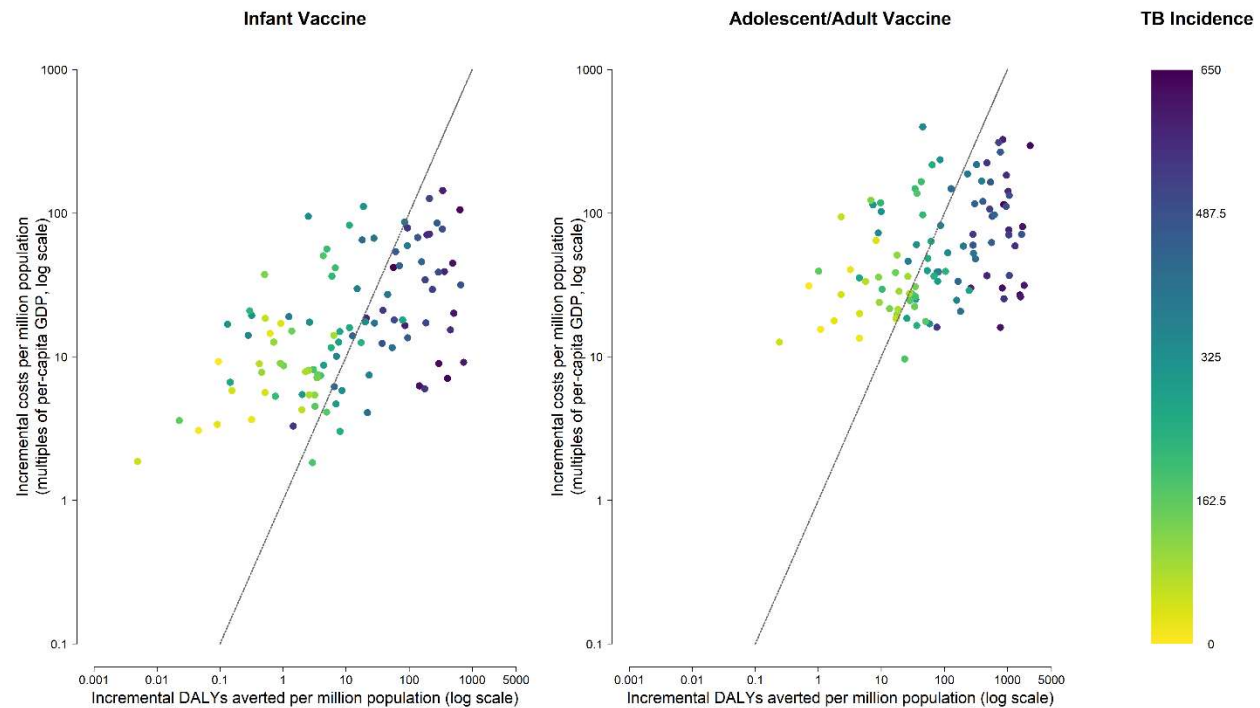

Note: Points represent each of 105 low- and middle-income countries analyzed in the base-case scenario, stratified by tuberculosis incidence per 100,000. Line represents a cost-effectiveness threshold of 1x per-capita GDP in 2020. Vaccine introduction would be considered cost-effective for countries falling underneath this line. DALY = disability-adjusted life year; GDP = gross domestic product.

**Figure 2. Percentage of population that live in countries where vaccination was cost-effective compared to percentage of GDP per capita thresholds, comparing health system and societal perspectives.**

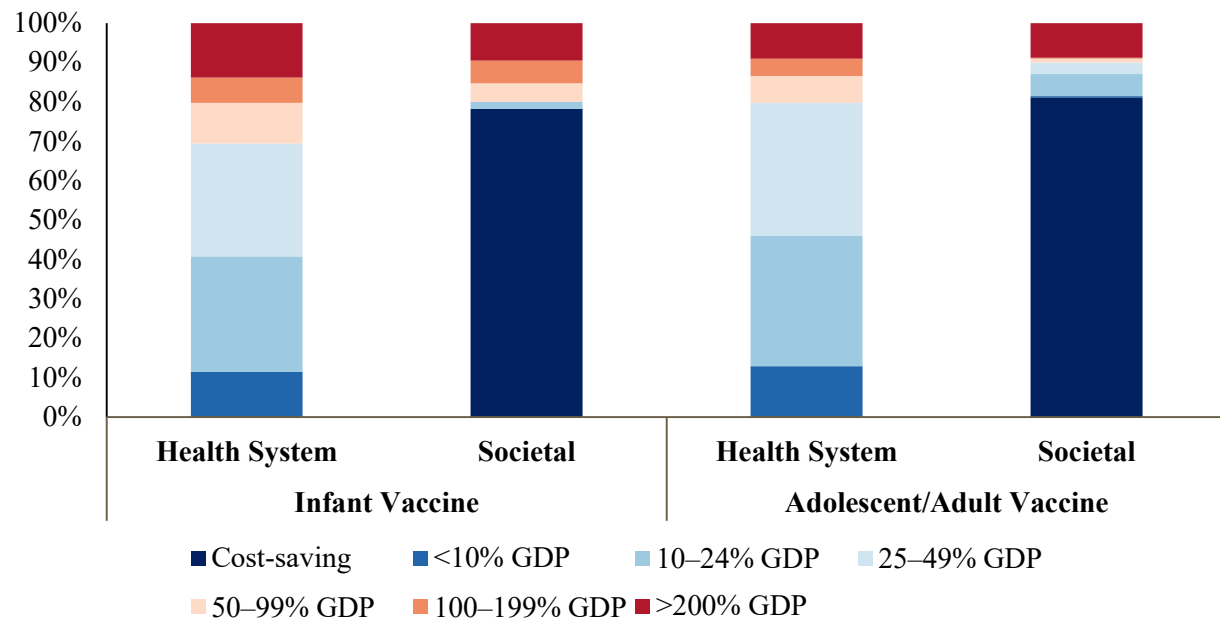

Note: Countries include 105 low- and middle-income countries analyzed. Population includes vaccinated individuals 2028–2050. GDP estimates from 2020. GDP = gross domestic product per capita.



**Figure 3. Incremental net monetary benefit of novel tuberculosis vaccines assessed from the societal perspective, for several willingness-to-pay thresholds.**

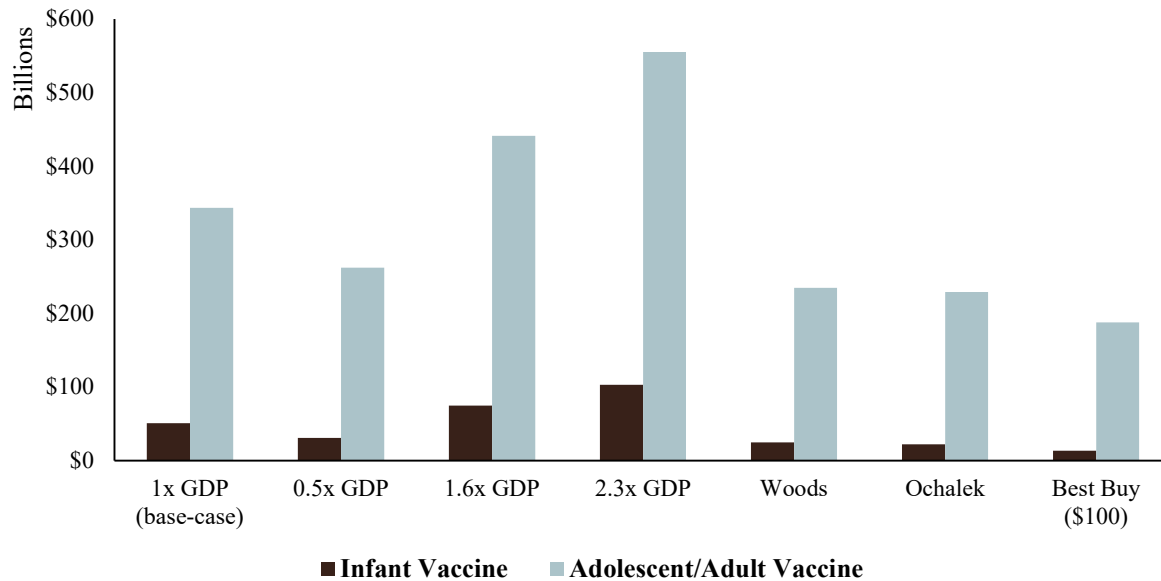

Note: Estimates include the incremental net monetary benefit from the countries that are cost-effective at the respective threshold.<sup>26-28</sup> GDP estimates from 2020. GDP = gross domestic product per capita.

## References

1. World Health Organization. Global Tuberculosis Report 2021. Geneva: World Health Organization. 14 October 2021. <https://www.who.int/teams/global-tuberculosis-programme/tb-reports/global-tuberculosis-report-2021> (accessed 1 December 2021).
2. World Health Organization. The End TB Strategy. Geneva: World Health Organization. 16 August 2015. <https://www.who.int/teams/global-tuberculosis-programme/the-end-tb-strategy> (accessed 1 July 2021).
3. Silva S, Arinaminpathy N, Atun R, Goosby E, Reid M. Economic impact of tuberculosis mortality in 120 countries and the cost of not achieving the Sustainable Development Goals tuberculosis targets: a full-income analysis. *Lancet Glob Health* 2021; **9**(10): e1372-e9.
4. Tait DR, Hatherill M, Van Der Meeren O, et al. Final Analysis of a Trial of M72/AS01(E) Vaccine to Prevent Tuberculosis. *N Engl J Med* 2019; **381**(25): 2429-39.
5. Hutubessy R, Lauer JA, Giersing B, et al. The Full Value of Vaccine Assessments (FVVA): A Framework to Assess and Communicate the Value of Vaccines for Investment and Introduction Decision Making. 7 May 2021. <http://dx.doi.org/10.2139/ssrn.3841999> (accessed 27 May 2021).
6. Gebreselassie N, Hutubessy R, Vekemans J, den Boon S, Kasaeva T, Zignol M. The case for assessing the full value of new tuberculosis vaccines. *Eur Respir J* 2020; **55**(3).
7. Clark RA, Mukandavire C, Portnoy A, et al. The impact of alternative delivery strategies for novel tuberculosis vaccines in low- and middle-income countries: a modelling study. medRxiv 2022.04.16.22273762; doi: <https://doi.org/10.1101/2022.04.16.22273762>.
8. World Bank. World Bank Country and Lending Groups. Washington, DC: The World Bank; 2019. <https://blogs.worldbank.org/opendata/new-country-classifications-income-level-2019-2020> (accessed 4 December 2020).
9. World Health Organization. WHO releases new global lists of high-burden countries for TB, HIV-associated TB and drug-resistant TB. 17 June 2021. <https://www.who.int/news/item/17-06-2021-who-releases-new-global-lists-of-high-burden-countries-for-tb-hiv-associated-tb-and-drug-resistant-tb> (accessed 1 July 2021).
10. World Health Organization. WHO Preferred Product Characteristics for New Tuberculosis Vaccines. Geneva: World Health Organization. Licence: CC BY-NC-SA 3.0 IGO. 13 July 2018. <https://www.who.int/publications/i/item/WHO-IVB-18.06> (accessed 18 October 2021).
11. World Health Organization. WHO-UNICEF estimates of DTP3 coverage: monitoring system 2019 global summary. Geneva: WHO/UNICEF. 15 July 2020. [http://apps.who.int/immunization\\_monitoring/globalsummary/timeseries/tswucoveredtp3.html](http://apps.who.int/immunization_monitoring/globalsummary/timeseries/tswucoveredtp3.html) (accessed 20 April 2021).
12. Harris RC, Sumner T, Knight GM, Zhang H, White RG. Potential impact of tuberculosis vaccines in China, South Africa, and India. *Sci Transl Med* 2020; **12**(564).
13. World Health Organization. WHO TB Burden Estimates. Geneva: World Health Organization. 14 October 2021. <https://www.who.int/tb/country/data/download/en/> (accessed 17 December 2021).
14. Salomon JA, Haagsma JA, Davis A, et al. Disability weights for the Global Burden of Disease 2013 study. *Lancet Glob Health* 2015; **3**(11): e712-23.
15. Global Burden of Disease Collaborative Network. Global Burden of Disease Study 2019 (GBD 2019) Reference Life Table. Seattle, United States of America: Institute for Health

- Metrics and Evaluation (IHME). 5 January 2021. <https://doi.org/10.6069/1D4Y-YQ37> (accessed 17 February 2021).
16. Laurence YV, Griffiths UK, Vassall A. Costs to Health Services and the Patient of Treating Tuberculosis: A Systematic Literature Review. *Pharmacoeconomics* 2015; **33**(9): 939-55.
  17. Siapka M, Vassall A, Cunnam L, et al. Cost of tuberculosis treatment in low- and middle-income countries: systematic review and meta-regression. *Int J Tuberc Lung Dis* 2020; **24**(8): 802-10.
  18. van den Hof S, Collins D, Hafidz F, Beyene D, Tursynbayeva A, Tiemersma E. The socioeconomic impact of multidrug resistant tuberculosis on patients: results from Ethiopia, Indonesia and Kazakhstan. *BMC Infect Dis* 2016; **16**(1): 470.
  19. Global Health Cost Consortium. Unit Cost Study Repository, Version 5.0. 8 May 2020. <https://ghcosting.org/pages/data/ucsr/app/> (accessed 3 February 2021).
  20. World Health Organization. Tuberculosis patient cost surveys: a hand book. Geneva: World Health Organization. 2 November 2017. <https://www.who.int/publications/i/item/9789241513524> (accessed 23 March 2021).
  21. World Health Organization. National surveys of costs faced by TB patients and their households, 2015-2021. Geneva: 2022. In press (2022).
  22. UNICEF. Vaccines pricing data. 8 March 2022. <https://www.unicef.org/supply/vaccines-pricing-data> (accessed 17 March 2022).
  23. UNICEF. Costs of Vaccinating a Child. 14 August 2020. <https://immunizationeconomics.org/recent-activity/2021/6/15/standard-costs-of-vaccinating-a-child> (accessed 20 January 2021).
  24. Portnoy A, Vaughan K, Clarke-Deelder E, et al. Producing Standardized Country-Level Immunization Delivery Unit Cost Estimates. *Pharmacoeconomics* 2020; **38**(9): 995-1005.
  25. Gavi The Vaccine Alliance. GAVI Alliance Vaccine Introduction Grant and Operational Support for Campaigns Policy. Version No. 1.0. Geneva: Gavi, The Vaccine Alliance. 2 April 2013. [www.gavi.org](http://www.gavi.org) (accessed 12 July 2018).
  26. World Bank. World development indicators. Washington, DC: The World Bank; 2021. <http://data.worldbank.org/> (accessed 19 January 2022).
  27. Ochalek J, Lomas J, Claxton K. Estimating health opportunity costs in low-income and middle-income countries: a novel approach and evidence from cross-country data. *BMJ Glob Health* 2018; **3**(6): e000964.
  28. Woods B, Revill P, Sculpher M, Claxton K. Country-Level Cost-Effectiveness Thresholds: Initial Estimates and the Need for Further Research. *Value Health* 2016; **19**(8): 929-35.
  29. Briggs AH, Weinstein MC, Fenwick EA, Karnon J, Sculpher MJ, Paltiel AD. Model parameter estimation and uncertainty: a report of the ISPOR-SMDM Modeling Good Research Practices Task Force--6. *Value Health* 2012; **15**(6): 835-42.
  30. The Global Fund. Fight for What Counts: The Global Fund Investment Case. Seventh Replenishment 2022. 23 February 2022. <https://www.theglobalfund.org/en/fight-for-what-counts/> (accessed 16 March 2022).
